# Supplementary material for: Vitamin B12 Reduces TDP-43 Toxicity by Alleviating Oxidative Stress and Mitochondrial Dysfunction
Source: MDPI journal article supplement (doi:10.3390/antiox11010082), 2021-12-29
Supplement: s1 [file s1]

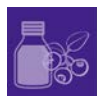

# Vitamin B12 Reduces TDP-43 Toxicity by Alleviating Oxidative Stress and Mitochondrial Dysfunction

Yu-Mi Jeon <sup>1,†</sup>, Younghwi Kwon <sup>1,2,†</sup>, Shinrye Lee <sup>1</sup>, Seyeon Kim <sup>1,2</sup>, Myungjin Jo <sup>1</sup>, Seongsoo Lee <sup>3</sup>, Sang Ryong Kim <sup>4,5</sup>, Kiyoun Kim <sup>6,7,\*</sup> and Hyung-Jun Kim <sup>1,2,\*</sup>

<sup>1</sup> Dementia Research Group, Korea Brain Research Institute, Daegu 41068, Korea; ekpd0345@kbri.re.kr (Y.-M.J.); yhkwn@kbri.re.kr (Y.K.); srlee@kbri.re.kr (S.L.); seyeon@kbri.re.kr (S.K.); jomj@kbri.re.kr (M.J.)

<sup>2</sup> Department of Brain and Cognitive Sciences, DGIST, Daegu 41068, Korea

<sup>3</sup> Gwangju Center, Korea Basic Science Institute, Gwangju 61886, Korea; soolee@kbsi.re.kr

<sup>4</sup> School of Life Sciences, Kyungpook National University, Daegu 41566, Korea; srk75@knu.ac.kr

<sup>5</sup> BK21 FOUR KNU Creative BioResearch Group, Kyungpook National University, Daegu 41566, Korea

<sup>6</sup> Department of Medical Biotechnology, Soonchunhyang University, Asan 31538, Korea

<sup>7</sup> Department of Medical Sciences, Soonchunhyang University, Asan 31538, Korea

\* Correspondence: kiyoun2@sch.ac.kr (K.K.); kijang1@kbri.re.kr (H.-J.K.); Tel.: +82-41-413-5024 (K.K.); +82-53-980-8380 (H.-J.K.)

† These authors contributed equally to this work.

## Supplementary Methods

Supplemental Table S1. Primers used in qPCR experiments.

| Gene     | Accession number | Direction | Primer sequence               | Species           |
|----------|------------------|-----------|-------------------------------|-------------------|
| ATF4     | NM_001675        | Forward   | 5'-GAGGTGGCCAAGCACTTCAA       | <i>H. sapiens</i> |
|          |                  | Reverse   | 5'-GCCCCGCTTAGCCTTGTC         |                   |
| CHOP     | NM_001675        | Forward   | 5'-GGGAGCTGGAAGCCTGGTAT       |                   |
|          |                  | Reverse   | 5'-CCCCATTTTCATCTGAAGACA      |                   |
| GADD34   | U83981           | Forward   | 5'-CCCAGAAACCCCTACTCATGATC    |                   |
|          |                  | Reverse   | 5'-TCGGAGAAGCGCACCTTT         |                   |
| ND1      | LC178901         | Forward   | 5'-CCCTTCGCTGACGCCATA         |                   |
|          |                  | Reverse   | 5'-TGGTAGATGTGGCGGGTTTT       |                   |
| ND2      | AF014899         | Forward   | 5'-GCAAGCAACCGCATCCATA        |                   |
|          |                  | Reverse   | 5'-CATGTCCGGAGAGTATATTGTTGA   |                   |
| ND3      | JN034128         | Forward   | 5'-CCTACCATGAGCCCTACAAACAAC   |                   |
|          |                  | Reverse   | 5'-GGTGATGATTAATAAGAGGGATGACA |                   |
| ND4      | JN034131         | Forward   | 5'-AGCTCCATCTGCCTACGACAA      |                   |
|          |                  | Reverse   | 5'-TATGTGGCTGATTGAAGAGTATGCA  |                   |
| ND5      | DQ926980         | Forward   | 5'-CACAGCAGCCATTCAAGCAA       |                   |
|          |                  | Reverse   | 5'-AGGCGAGGATGAAACCGATA       |                   |
| POLG     | NM_002693        | Forward   | 5'-AAGCAGGGCAAACACAAGGT       |                   |
|          |                  | Reverse   | 5'-GGCTTTCCTCTGGGACTTCTG      |                   |
| cGAS     | KC294566         | Forward   | 5'-CGGGCGGTTTTGGAGAA          |                   |
|          |                  | Reverse   | 5'-GCCGCCGTGGAGATATCA         |                   |
| STING    | NM_198282        | Forward   | 5'-CTGGCCCCAGCTGAGATCT        |                   |
|          |                  | Reverse   | 5'-CATGGGCCACGTTGAAATTC       |                   |
| TBK1     | XM_005268809     | Forward   | 5'-TGGAAGGCTGGCACAACAT        |                   |
|          |                  | Reverse   | 5'-GAGGTTCCCGGCTTACTACAAA     |                   |
| IRF3     | NM_001571        | Forward   | 5'-TAAGCCAGACCTGCCAACCT       |                   |
|          |                  | Reverse   | 5'-CTGCTAAACGCAACCCTTCTTT     |                   |
| ATF5     | NM_012068        | Forward   | 5'-GGACCGCAAGCAAAAGAAGA       |                   |
|          |                  | Reverse   | 5'-CGCTGGCGGTACCTCAGA         |                   |
| LonP1    | XM_011528441     | Forward   | 5'-CCAACGTCACGGACACCAT        |                   |
|          |                  | Reverse   | 5'-CGACACGTTGATCATCTCCATAC    |                   |
| HSP60    | AF143723         | Forward   | 5'-GGCGGCCATCGGAGTT           |                   |
|          |                  | Reverse   | 5'-ATCCTTATAGACGGCCTCACATG    |                   |
| HSPA9    | NM_004134        | Forward   | 5'-TTCTTGTGGGTGGCATGACTAG     |                   |
|          |                  | Reverse   | 5'-TGCCAAAAAGATCCTGTACAGTCT   |                   |
| 18S rRNA | M10098           | Forward   | 5'-CGGCGACGACCCATTC           |                   |
|          |                  | Reverse   | 5'-CACGGCGACTACCATCGAA        |                   |
| GAPDH    | NM_002046        | Forward   | 5'-GTCAGTGGTGGACCTGACCT       |                   |
|          |                  | Reverse   | 5'-TGCTGTAGCCAAATTCGT TG      |                   |

## Supplementary Figure

**A**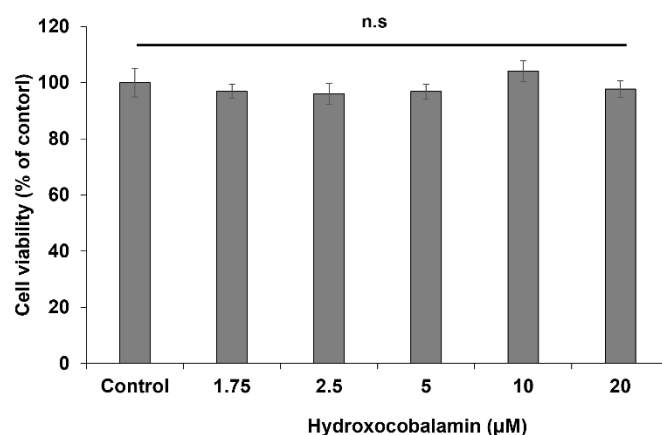**B**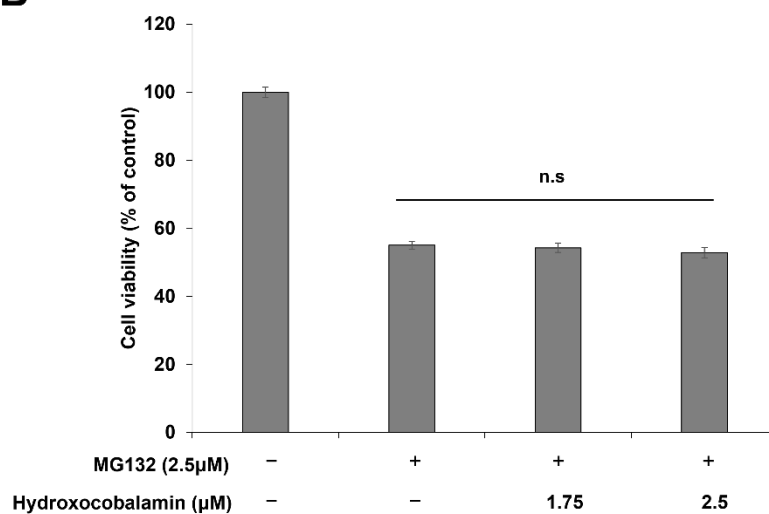

**Figure S1.** MG132-induced toxicity was not affected by hydroxycobalamin. (A) SH-SY5Y cells were treated with various concentrations of hydroxycobalamin for 24 h, cell viability was determined by CCK-8 assay, and the percentage of cell viability was expressed as the mean  $\pm$  SD of three independent experiments (n.s., not significant, one-way ANOVA using Tukey's multiple comparison test). (B) A CCK-8 assay was performed to evaluate the effect of Hb on MG132 (2.5  $\mu\text{M}$ )-induced toxicity in SH-SY5Y cells. Hb had no effect on MG132-induced toxicity. Data are presented as the mean  $\pm$  SD of three independent experiments. The significance was determined by one-way ANOVA with Tukey's multiple comparison test (n.s., not significant).

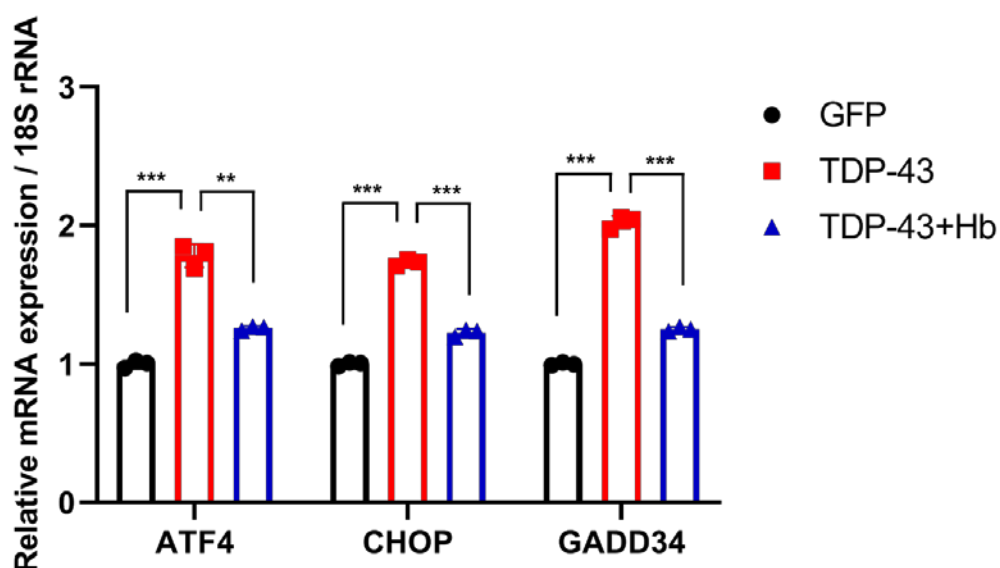

**Figure S2.** Hydroxocobalamin mitigates the TDP-43-induced unfolded protein response in neuronal cells. Cells were infected with the GFP- or GFP-tagged human WT TDP-43 containing lentivirus and grown for 2 days. The day before harvest, the cells were treated with Hb (10  $\mu$ M) for 24 h. The transcription levels of ER stress-related genes, including *ATF4*, *CHOP*, and *GADD34*, were detected using real-time PCR. 18S rRNA was used as an internal control. Error bars represent the mean values  $\pm$  SD of three independent experiments. The significance of differences was determined using one-way ANOVA with Tukey's multiple comparison test (\*\* $p < 0.01$  and \*\*\* $p < 0.001$ ).
